# Supplementary material
Source: Springer Nature journal article supplement (https://www.springermedizin.de/resource/supplementary/12889_2011_2998_MOESM3_ESM.pdf/9487834)
Supplement: MOESM3 [file 9487834]

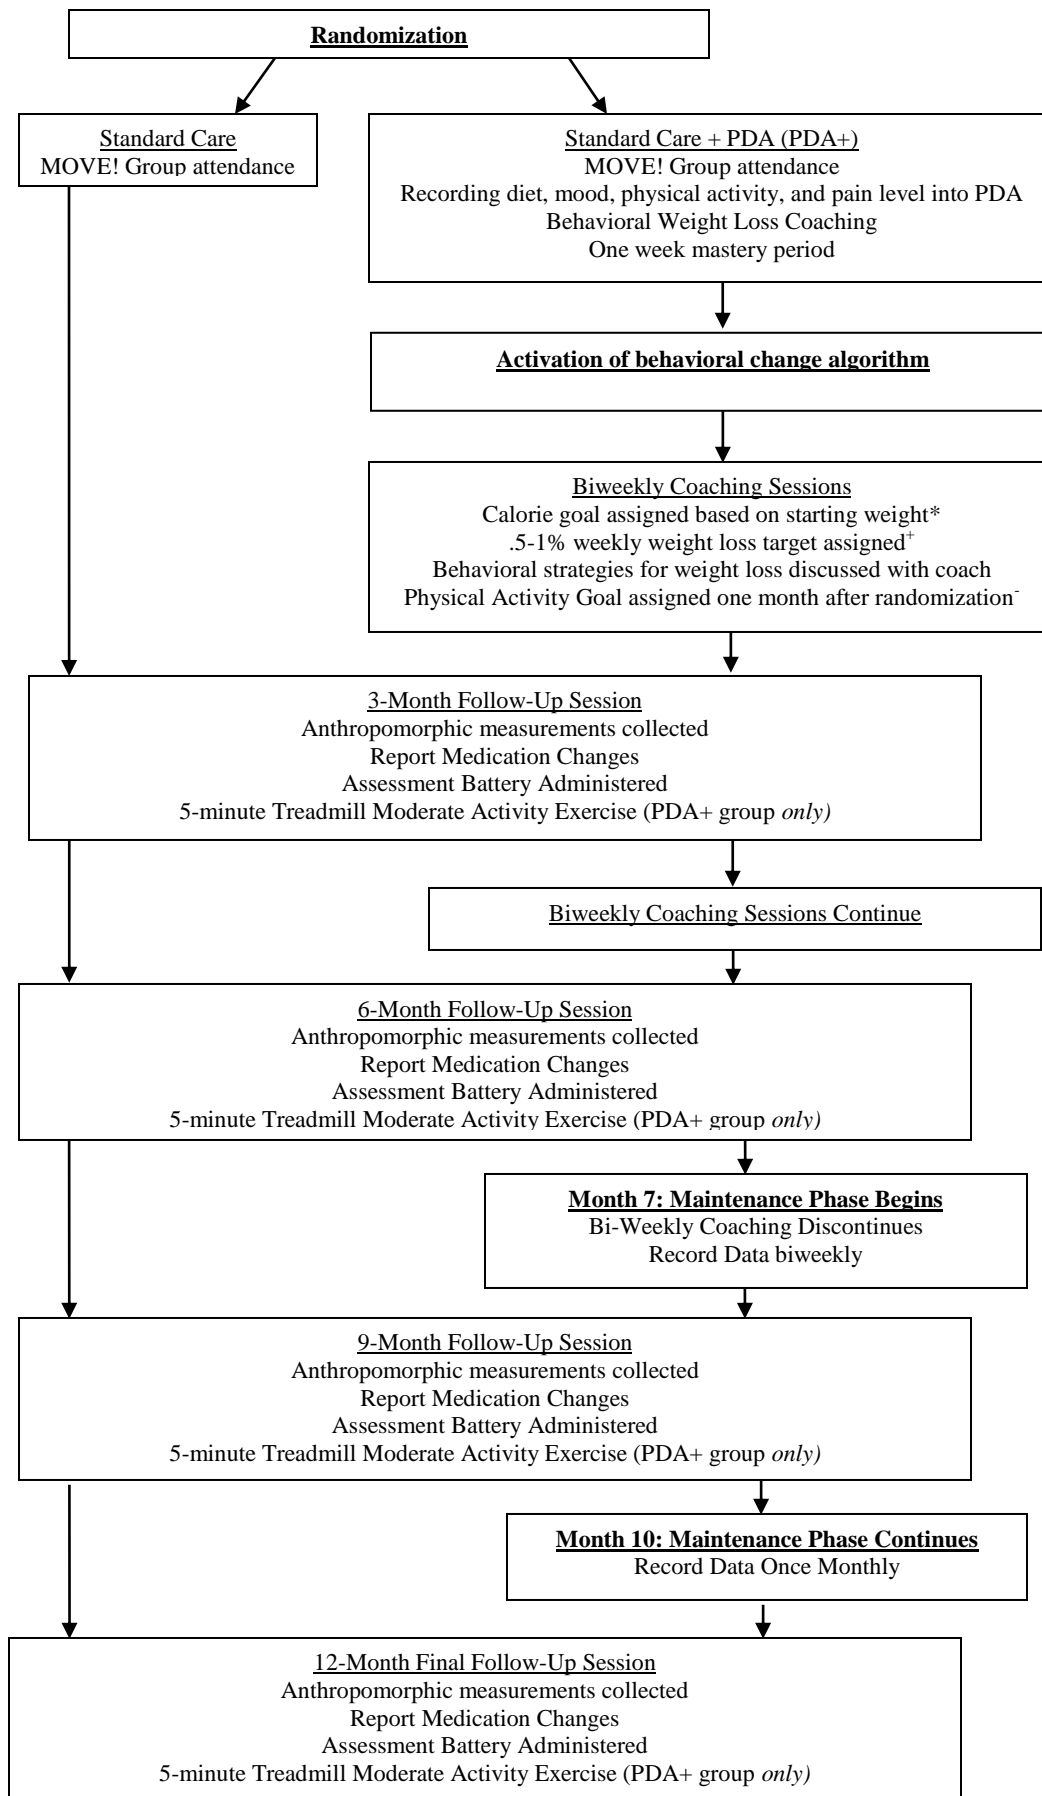

\* Participants that weigh  $\geq 250$  lbs., start at 1800-1500 kcalories (kcal), Those who weigh  $< 250$ , will start between 1500-1200 kcal.

+ Participants will also be given a weekly weight loss target, which is equal to .5-1% of their current weight.

- Participants who have not recorded physical activity will start at a 15 minute/day goal. The goal in minutes will be increased by 25% incrementally until 60 minutes per day is achieved
